# Supplementary material
Source: Springer Nature journal article supplement (https://www.springermedizin.de/resource/supplementary/12885_2013_5225_MOESM1_ESM.pdf/9466218)
Supplement: MOESM1 [file 9466218]

**Gastric adenocarcinoma T3 and/or T4 and/or N+**  
(Thoracoabdominal CT and ultrasound endoscopy) with **indication of curative gastrectomy**

**+/- Neoadjuvant therapy (MDT decision)**

Thoracoabdominal CT scan and laparoscopy with peritoneal washing for cytology (within 3 weeks before inclusion)

Gastric cancer **T3 or T4 and/or N+ and/or with positive cytology (Cy+)**

Metastasis  
Pancreas head involvement

Registration and informed consent

**Surgery**  
Pre-gastrectomy cytology  
Radical gastrectomy  
Post-gastrectomy cytology  
D1-D2 lymph node dissection  
**+ Randomization**

**Ancillary cytological study**

**ARM A**

**ARM B**

**HIPEC**  
Folinic Ac 20mg/m<sup>2</sup> IVD  
5-FU 400 mg/m<sup>2</sup> IVD  
Oxaliplatin 250 mg/m<sup>2</sup> into 2 Liters/m<sup>2</sup> of G5%

**No HIPEC**
